# Supplementary material for: Large-scale solution-phase production of Bi2Te3 and PbTe nanowires using Te nanowire templates
Source: Royal Society of Chemistry journal article supplement (doi:10.1039/c4nr01191k), 2014-01-01
Supplement: c4nr01191k1.pdf [file c4nr01191k1.pdf]

Large-scale solution-phase production of  $\text{Bi}_2\text{Te}_3$  and  $\text{PbTe}$  nanowires using  $\text{Te}$  nanowire templates:  
Supplementary Information

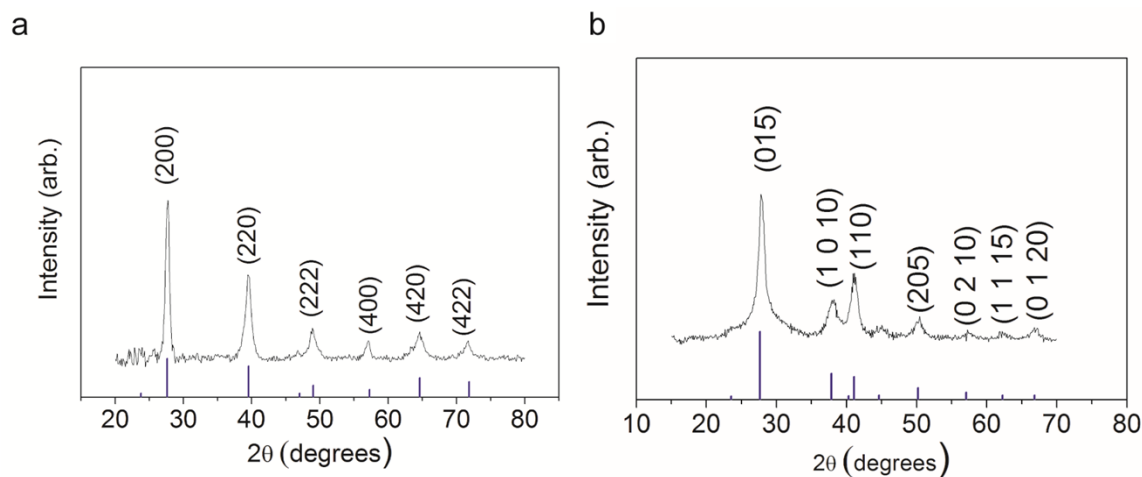

Figure S1. XRD patterns of a)  $\text{PbTe}$  nanowires eight months after their synthesis, b)  $\text{Bi}_2\text{Te}_3$  nanowires nine months after their synthesis

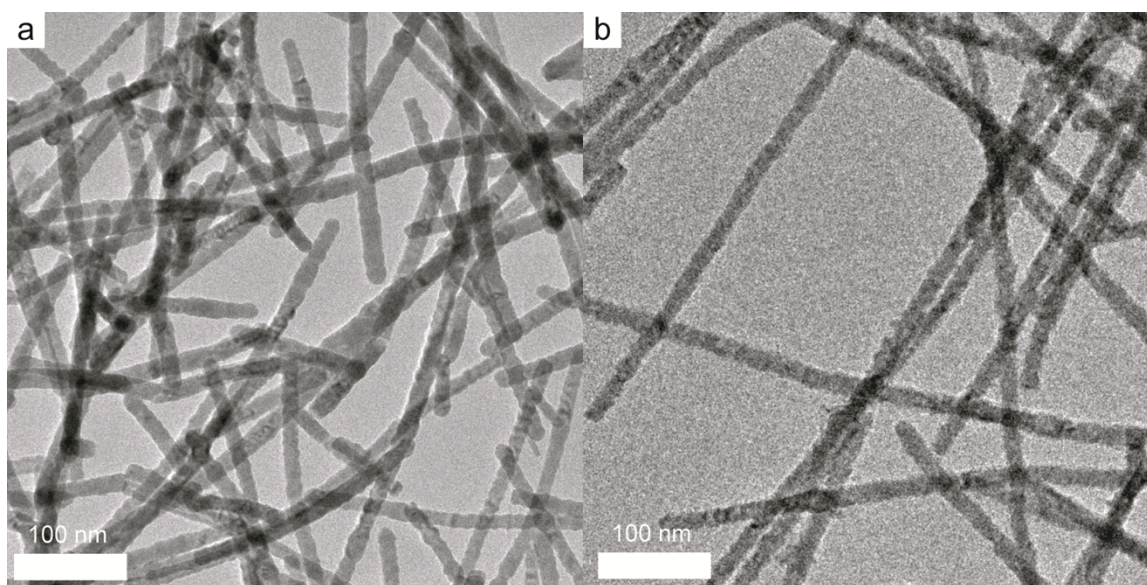

Figure S2. Low magnification TEM images of a)  $\text{PbTe}$  nanowires eight months after their synthesis, b)  $\text{Bi}_2\text{Te}_3$  nanowires nine months after their synthesis

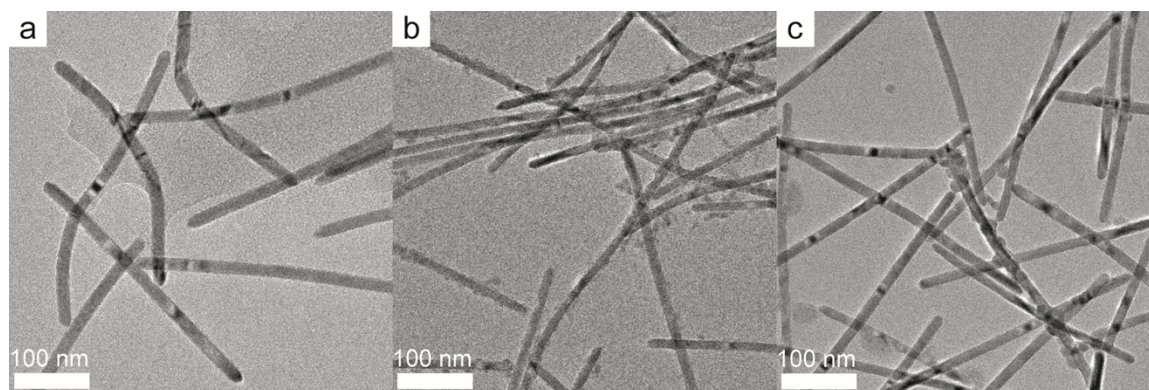

Figure S3. Low magnification TEM image of Te nanowires synthesized using  $\text{N}_2\text{H}_4$ :Te molar ratios of a) 12.7:1, b) 19.1:1, c) 21.2:1

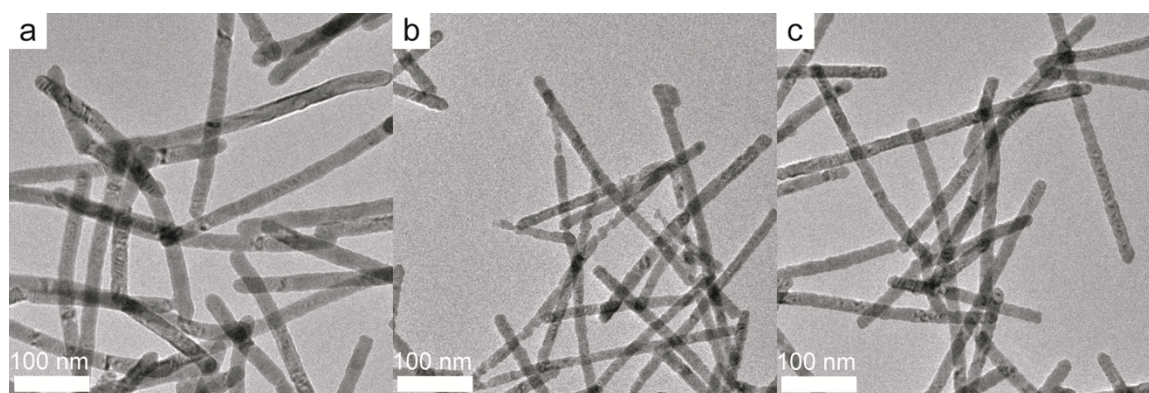

Figure S4. Low magnification TEM image of PbTe nanowires obtained after the second step of syntheses in which the  $\text{N}_2\text{H}_4$ :Te molar ratios for the first step were a) 12.7:1, b) 19.1:1, c) 21.2:1

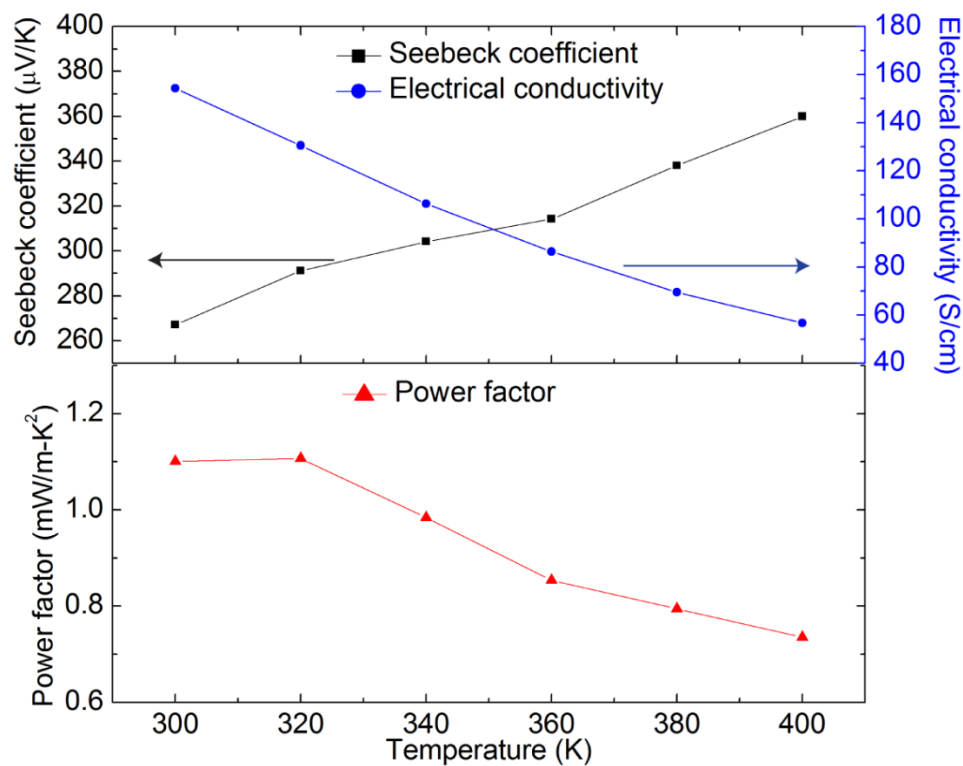

Figure S5. Seebeck coefficient, electrical conductivity and power factor of PbTe nanocomposite pellet at 300 – 400 K.

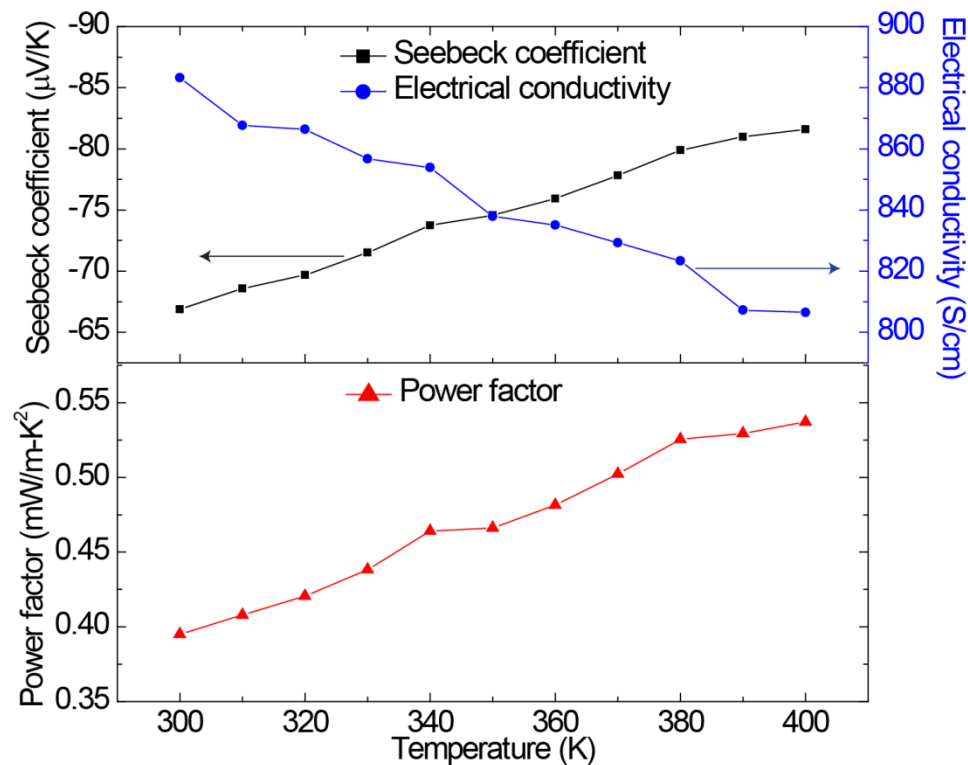

Figure S6. Seebeck coefficient, electrical conductivity and power factor of  $\text{Bi}_2\text{Te}_3$  nanocomposite pellet at 300 – 400 K.
